# Supplementary material for: Causal relationship between gut microbiota and diabetic nephropathy: a two-sample Mendelian randomization study
Source: PubMed Central journal article supplement (PMC10964483; doi:10.3389/fimmu.2024.1332757), 2024-03-08

## Supplementary Information

### Supplement Table S17

| Casual effects of MR Analysis between DN and causal GM (P<1.00E-05) |                                          |            |           |                 |                 |                 |                |
|---------------------------------------------------------------------|------------------------------------------|------------|-----------|-----------------|-----------------|-----------------|----------------|
| Exposure                                                            | Outcome                                  | Method     | NSNP      | $\beta$         | 95%CI           |                 | P              |
|                                                                     | Class                                    |            |           |                 |                 |                 |                |
| DN                                                                  | <i>Gammaproteobacteria</i>               | IVW        | 16        | 0.019101        | -0.013464       | 0.051667        | 0.250292       |
|                                                                     | <i>Verrucomicrobiae</i>                  | IVW        | 15        | 0.035929        | -0.002094       | 0.073952        | 0.064014       |
|                                                                     | Family                                   |            |           |                 |                 |                 |                |
| DN                                                                  | <i>Verrucomicrobiaceae</i>               | IVW        | 15        | 0.035861        | -0.002162       | 0.073884        | 0.06452        |
|                                                                     | Genus                                    |            |           |                 |                 |                 |                |
|                                                                     | <i>Butyricoccus</i>                      | IVW        | 16        | -8.23E-04       | -0.033451       | 0.031804        | 0.960556       |
|                                                                     | <i>Eubacteriumcoprostanoligenesgroup</i> | IVW        | 16        | -0.006155       | -0.043457       | 0.031148        | 0.746405       |
|                                                                     | <i>Howardella</i>                        | IVW        | 12        | 0.019079        | -0.051494       | 0.089651        | 0.596206       |
| DN                                                                  | <i>Lachnoclostridium</i>                 | IVW        | 16        | -0.011066       | -0.047813       | 0.02568         | 0.555023       |
|                                                                     | <i>Olsenella</i>                         | IVW        | 12        | -0.004858       | -0.08008        | 0.070364        | 0.899275       |
|                                                                     | <i>Oxalobacter</i>                       | IVW        | 12        | 0.019993        | -0.044556       | 0.084541        | 0.543804       |
|                                                                     | <i>RuminococcaceaeUCG002</i>             | IVW        | 16        | 0.028739        | -0.002835       | 0.060313        | 0.074417       |
|                                                                     | <i>Tyzzarella3</i>                       | IVW        | 13        | 0.021698        | -0.037667       | 0.081063        | 0.473758       |
|                                                                     | Order                                    |            |           |                 |                 |                 |                |
| DN                                                                  | <b><i>Rhodospirillales</i></b>           | <b>IVW</b> | <b>15</b> | <b>0.057802</b> | <b>0.012913</b> | <b>0.102692</b> | <b>0.01161</b> |
|                                                                     | <i>Verrucomicrobiales</i>                | IVW        | 15        | 0.035671        | -0.002382       | 0.073724        | 0.066163       |
|                                                                     | Phylum                                   |            |           |                 |                 |                 |                |
| DN                                                                  | <i>Bacteroidetes</i>                     | IVW        | 16        | 0.009145        | -0.021315       | 0.039606        | 0.556225       |
|                                                                     | <b><i>Proteobacteria</i></b>             | <b>IVW</b> | <b>16</b> | <b>0.040189</b> | <b>0.008524</b> | <b>0.071855</b> | <b>0.01286</b> |

### Supplement Table S18

| Results of sensitivity analysis DN on causal GM (IVW: P<0.05) |                         |          |           |                 |              |           |
|---------------------------------------------------------------|-------------------------|----------|-----------|-----------------|--------------|-----------|
| Exposure                                                      | Outcome                 | IVW_Q    | IVW_Q_P   | Egger_intercept | Pleiotropy_P | MR-PRESSO |
|                                                               | Order                   |          |           |                 |              |           |
| DN                                                            | <i>Rhodospirillales</i> | 10.87189 | 0.6960694 | 0.006074415     | 0.5784344    | 0.4486667 |
|                                                               | Phylum                  |          |           |                 |              |           |
| DN                                                            | <i>Proteobacteria</i>   | 16.1341  | 0.3731958 | 0.000513166     | 0.9486579    | 0.7693333 |

## Supplement Table S19

### Characterization of Exposure and Outcome

| Level    | Name           | Population | Reference or Website                                                                                                                                     | Database            |
|----------|----------------|------------|----------------------------------------------------------------------------------------------------------------------------------------------------------|---------------------|
| Exposure | Gut Microbiota | European   | Kurilshikov A, Medina-Gomez C, Bacigalupe R, et al. Large-scale association analyses identify host factors influencing human gut microbiome composition. | MiBioGen Consortium |
| Outcome  | DN             | European   | <a href="https://risteys.finregistry.fi/endpoints/DM_NEPHROPATHY">https://risteys.finregistry.fi/endpoints/DM_NEPHROPATHY</a>                            | FinnGen             |
|          | T1DM           | European   | <a href="https://risteys.finregistry.fi/endpoints/T1D_WIDE">https://risteys.finregistry.fi/endpoints/T1D_WIDE</a>                                        |                     |
|          | T2DM           | European   | <a href="https://risteys.finregistry.fi/endpoints/T2D_WIDE">https://risteys.finregistry.fi/endpoints/T2D_WIDE</a>                                        |                     |
|          | T1DN           | European   | <a href="https://risteys.finregistry.fi/endpoints/E4_DM1REN">https://risteys.finregistry.fi/endpoints/E4_DM1REN</a>                                      |                     |
|          | T2DN           | European   | <a href="https://risteys.finregistry.fi/endpoints/E4_DM2REN">https://risteys.finregistry.fi/endpoints/E4_DM2REN</a>                                      |                     |

# Supplement Figure S1

Scatter plots of significant and nominal significant from GM on DN.(A:genus.Eubacterium;B:genus.Howardella;C:genus.Lachnoclostridium;D:genus.Oxalobacter;E:genus.RuminococcaceaeUCG002;F:genus.Tyzzerella3;G:genus.unknowngenus;H:genus.unknowngenus;I:family.Oxalobacteraceae;J:family.Verrucomicrobiaceae;K:order.Rhodospirillales;L:order.Verrucomicrobiales;M:class.Actinobacteria;N:class.Gammaproteobacteria;O:class.Verrucomicrobiae;P:phylum.Bacteroidetes;Q:phylum.Proteobacteria)

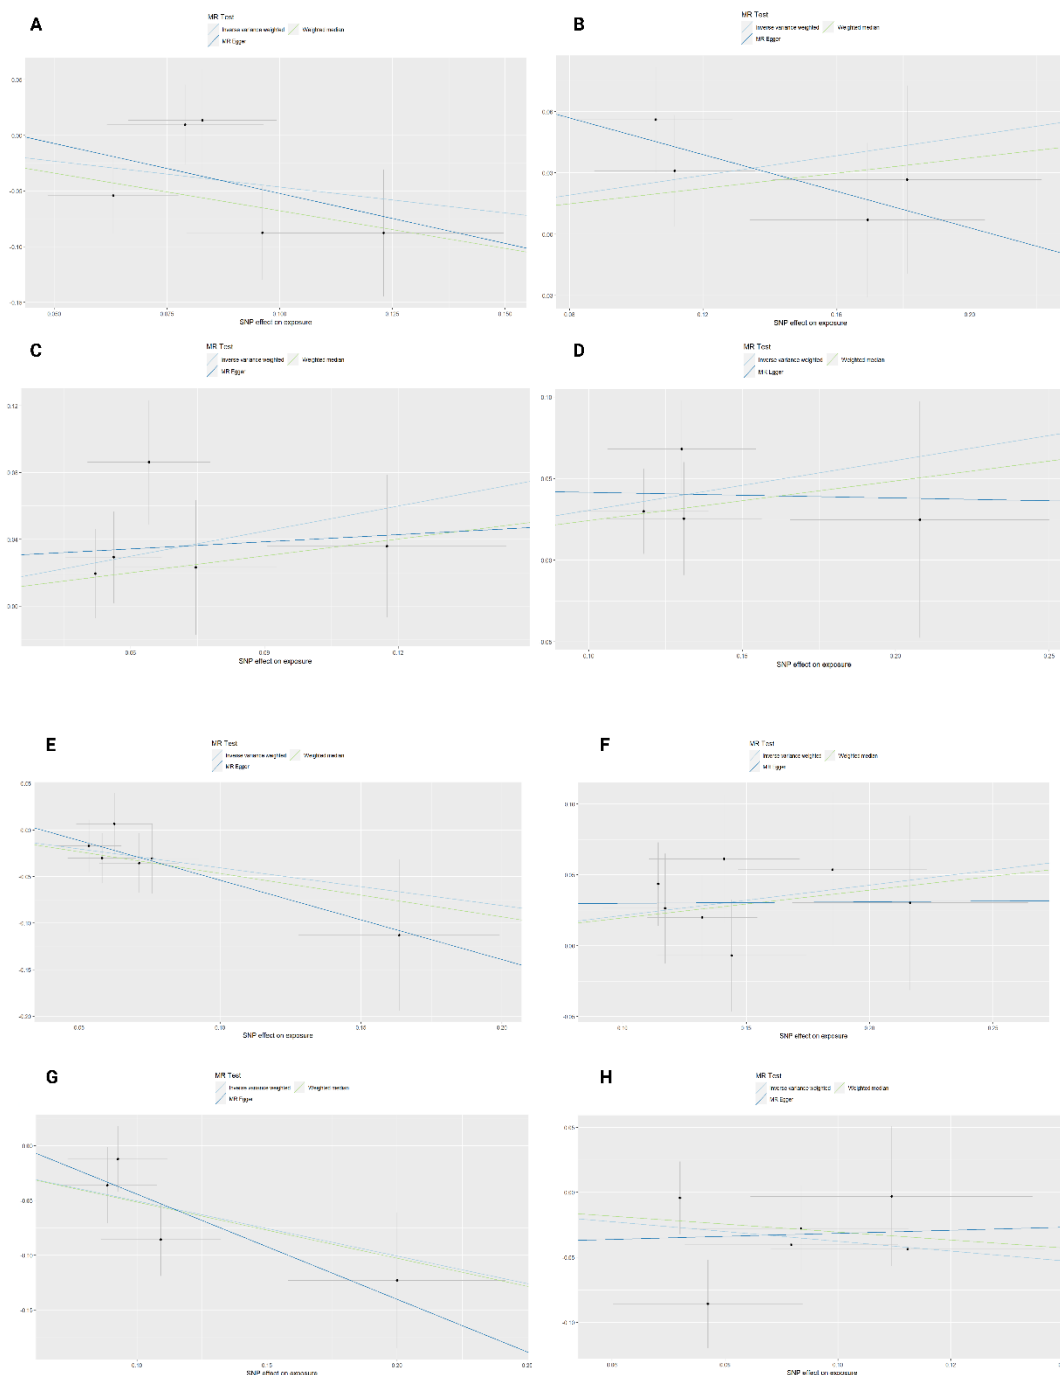

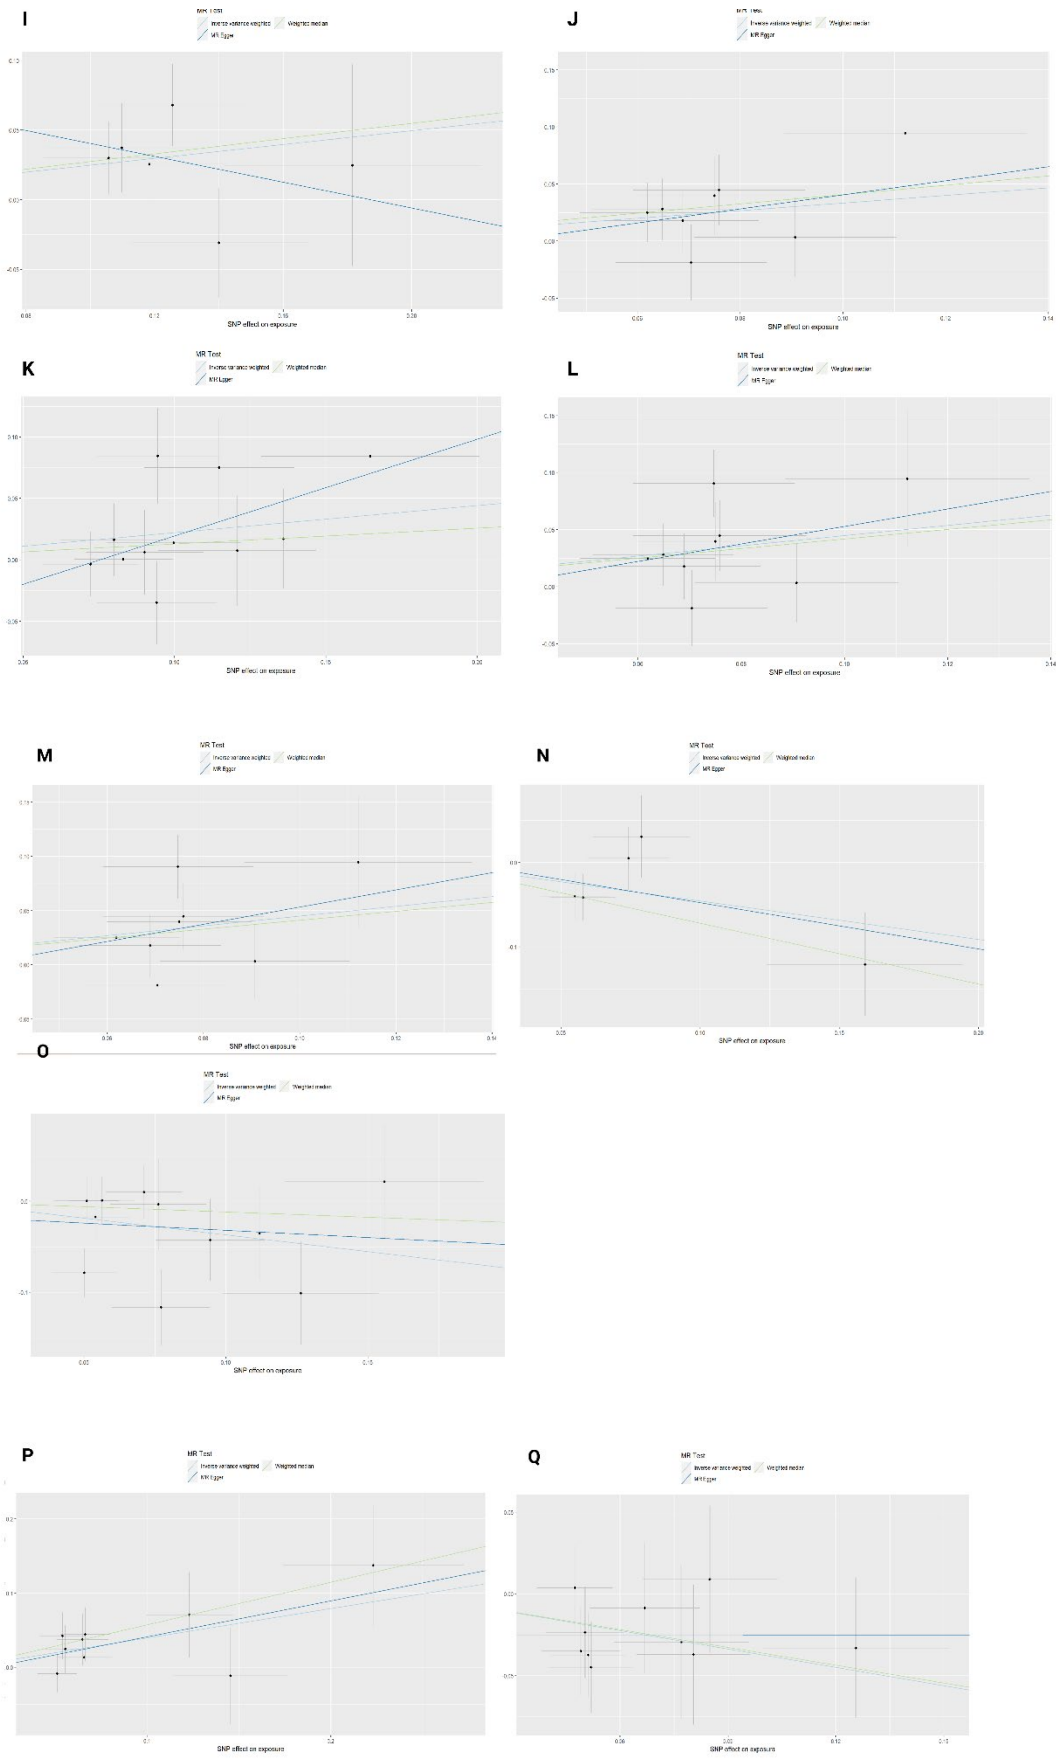

**Supplement Figure S2**

Funnel plots of significant and nominal significant from GM on DN. (A: order.Rhodospirillales;B: order.Verrucomicrobiales; C: phylum.Bacteroidetes;D: phylum.Proteobacteria;E: class. Actinobacteria; F:class.Verrucomicrobiae, SNP>8 can be drawn)

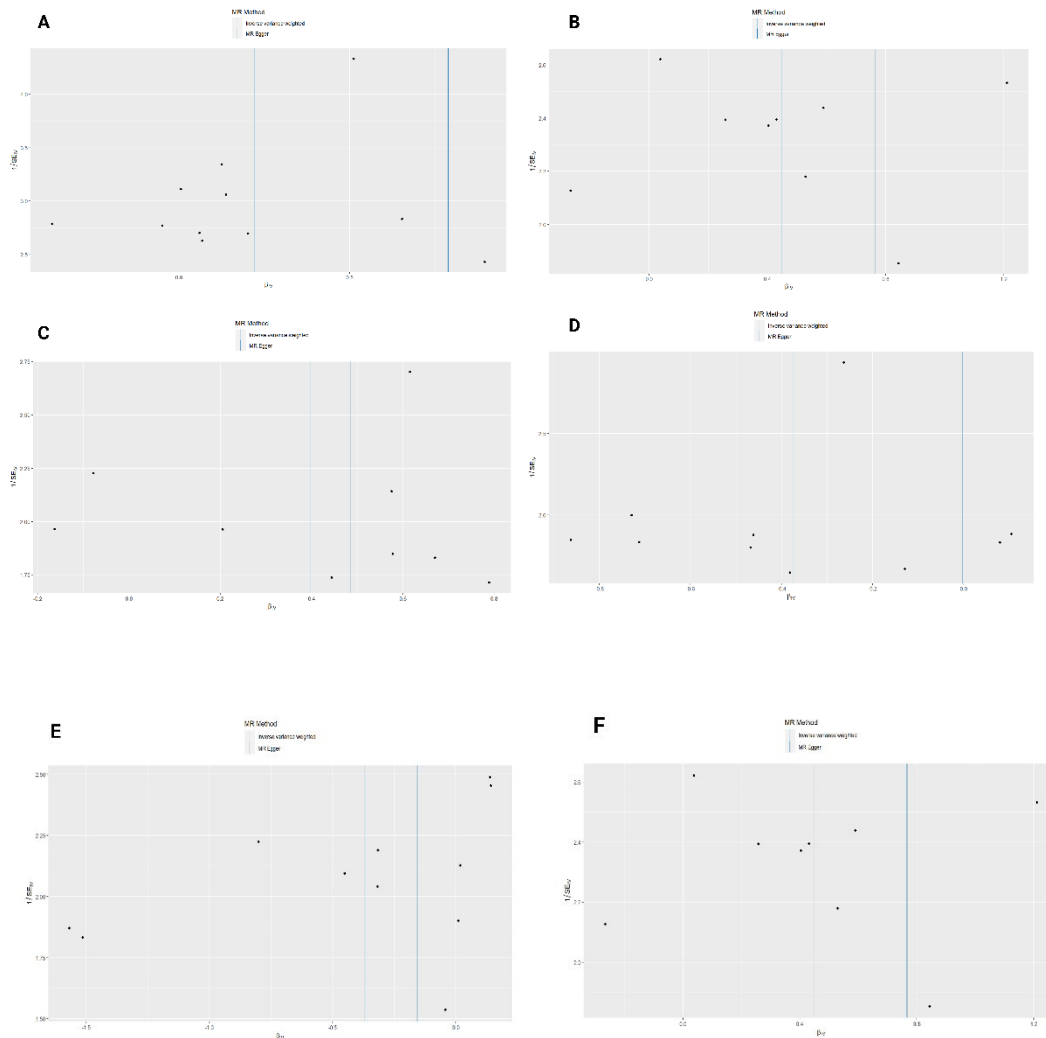

### Supplement Figure S3

Leave-one-out plots of significant and nominal significant from GM on DN. (A: order.Rhodospirillales; B: order.Verrucomicrobiales; C: phylum.Bacteroidetes; D: phylum.Proteobacteria; E: class. Actinobacteria; F:class.Verrucomicrobiae; G:family.Verrucomicrobiaceae; H:genus.Tyzzerrlla3; I:genus.Oxalobacter J:genus.Lachnoclostridium; K:genus.RuminococcaceaeUCG002; L:genus.Howardella; M:genus. Eubacteriumcoprostanoligenesgroup; N:family.Oxalobacteraceae; O:class.Gammaproteobacteria)



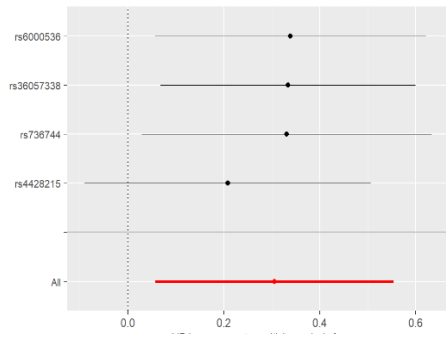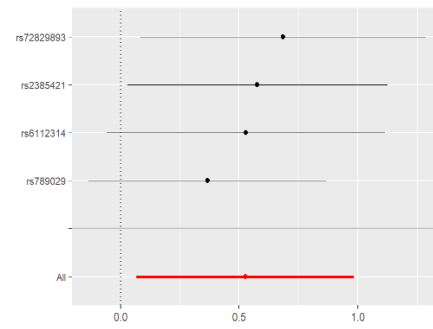

**K**

**L**

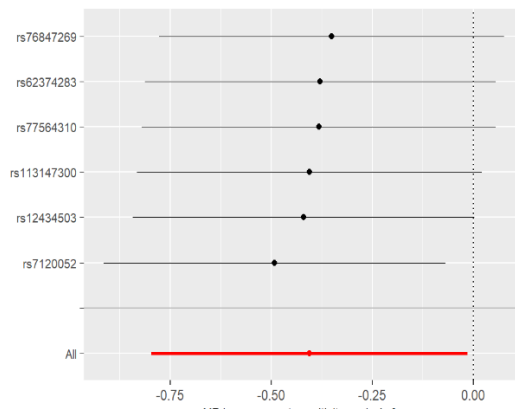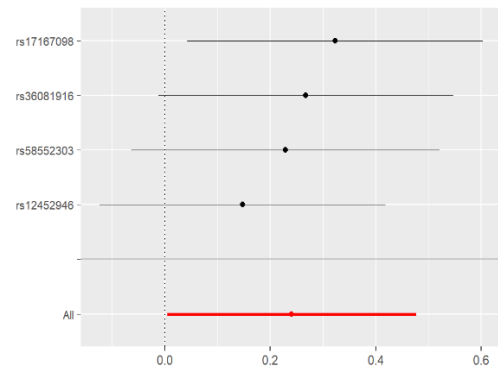

**M**

**N**

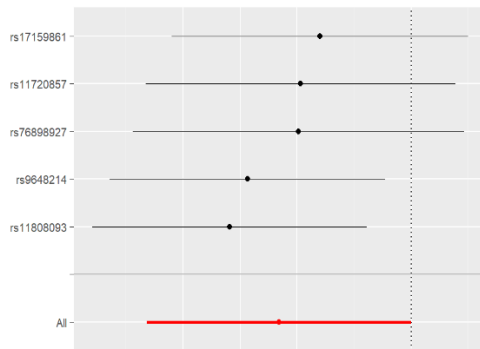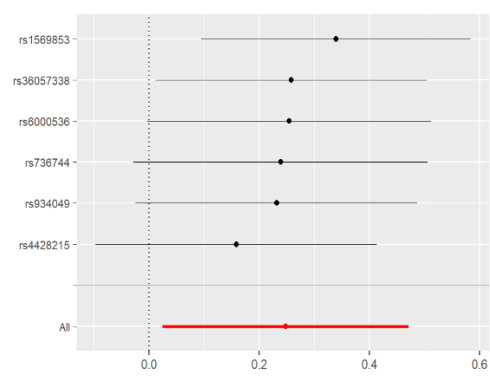

**O**

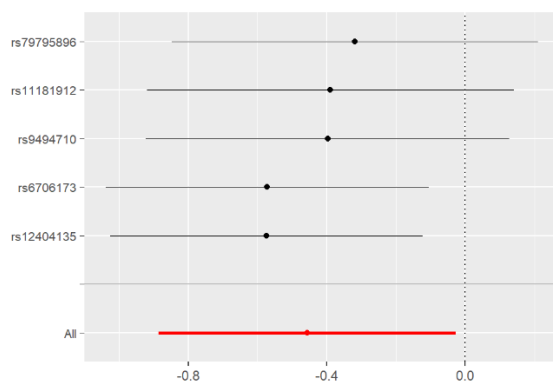

## Supplement Figure S4

Scatter plots of reverse MR analysis between DN and causal GM

(A:order.Rhodospirillales; B:phylum.Proteobacteria, IVW:  $P < 0.05$ ).

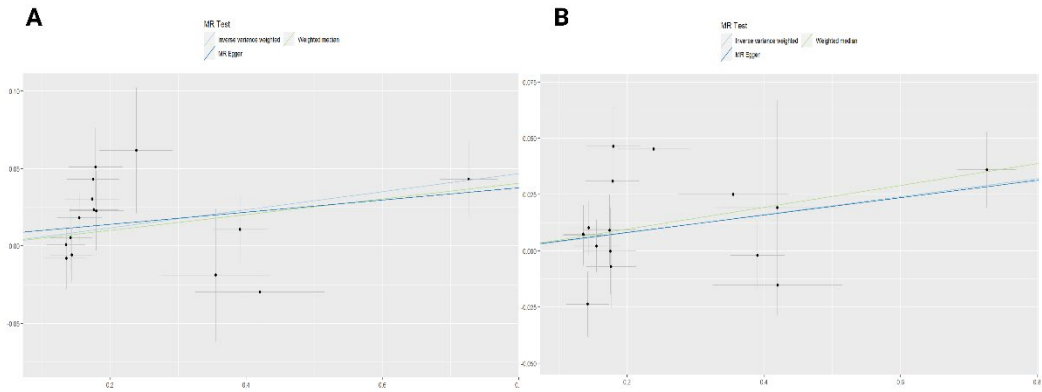

### Supplement Figure S5

Funnel plots of reverse MR analysis between DN and causal GM  
(A:order.Rhodospirillales; B:phylum.Proteobacteria, IVW:  $P < 0.05$ ).

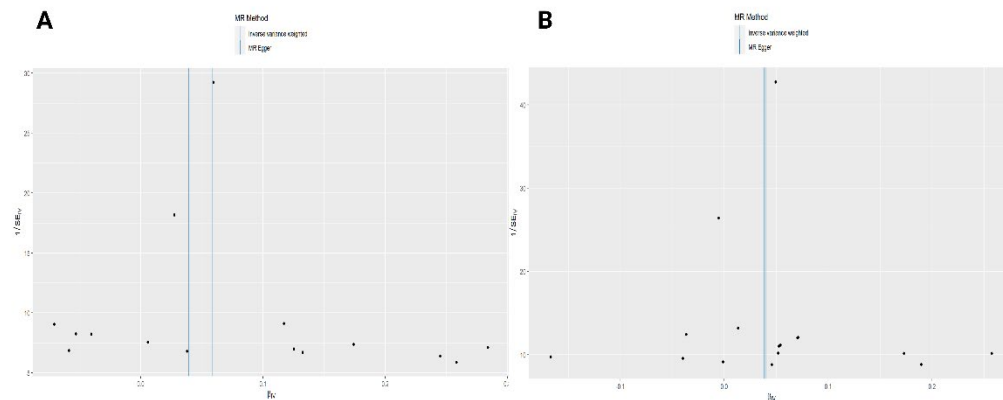

### Supplement Figure S6

Leave-one-out plots of reverse MR analysis between DN and causal GM  
(A:order.Rhodospirillales; B:phylum.Proteobacteria, IVW:  $P < 0.05$ ).



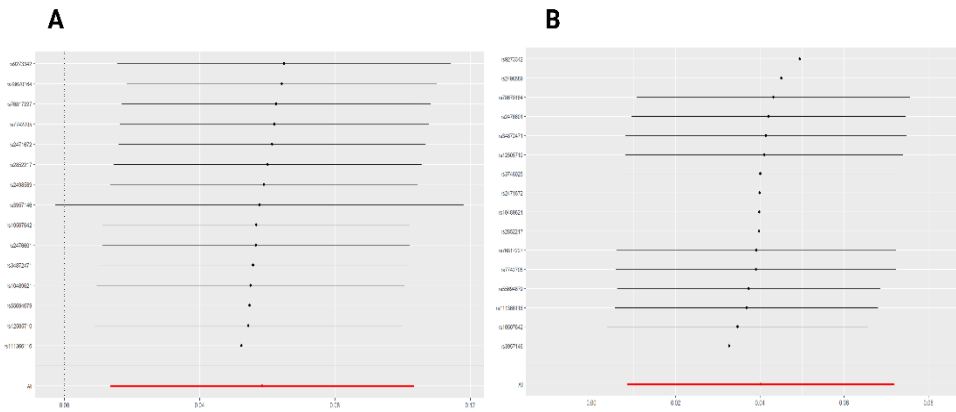

**Supplement Figure S7**

Scatter plots of MR analysis between T2DN and 19 causal GM. (A: family.Verrucomicrobiaceae;B:order.Rhodospirillales;C:order.Verrucomicrobiales; D:class.Verrucomicrobiaea, IVW: P<0.05)

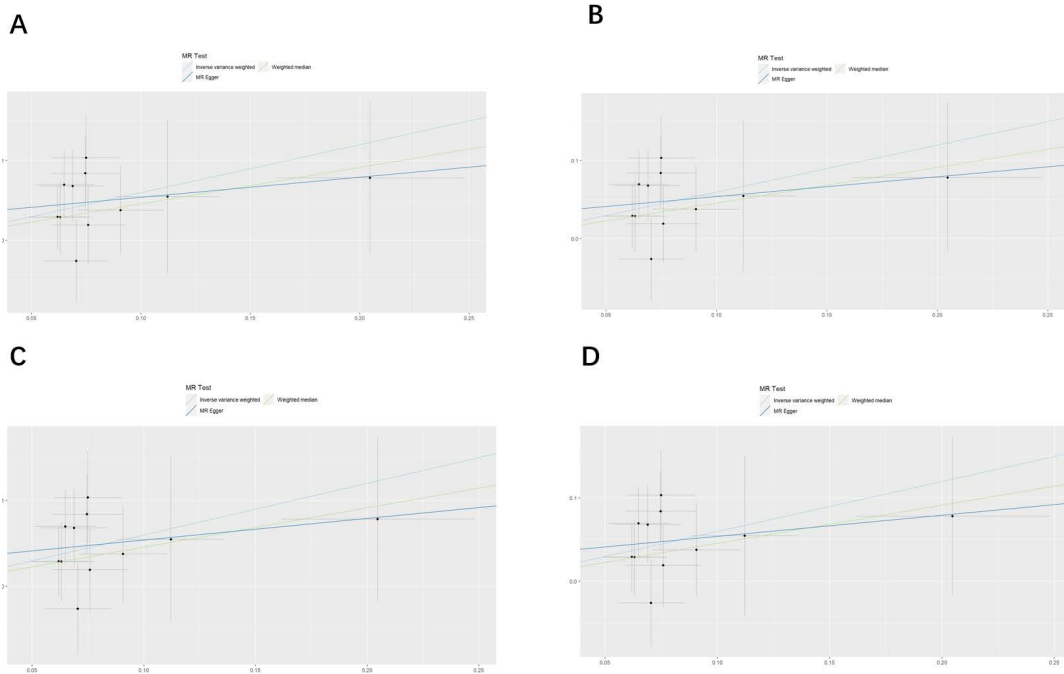

**Supplement Figure S8**

Funnel plots of MR analysis between T2DN and 19 causal GM.

(A: family. Verrucomicrobiaceae;  
 B:order.Rhodospirillales;C:order.Verrucomicrobiales;  
 D:class.Verrucomicrobiaea, IVW: P<0.05)

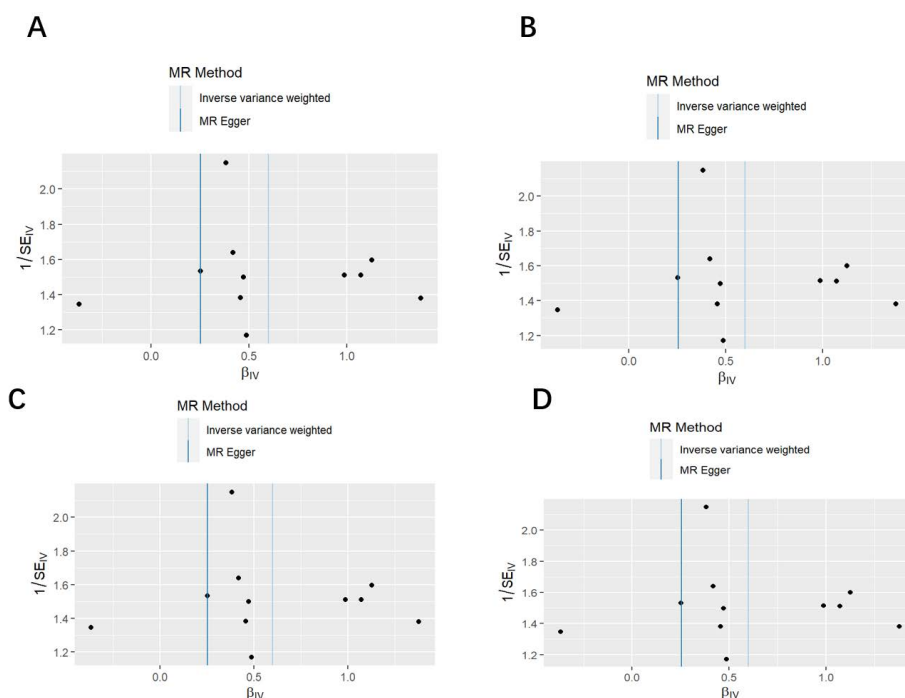

### Supplement Figure S9

Leave-one-out plots of MR analysis between T2DN and 19 causal GM.

(A: family. Verrucomicrobiaceae;  
 B:order.Rhodospirillales;C:order.Verrucomicrobiales;  
 D:class.Verrucomicrobiaea, IVW: P<0.05)

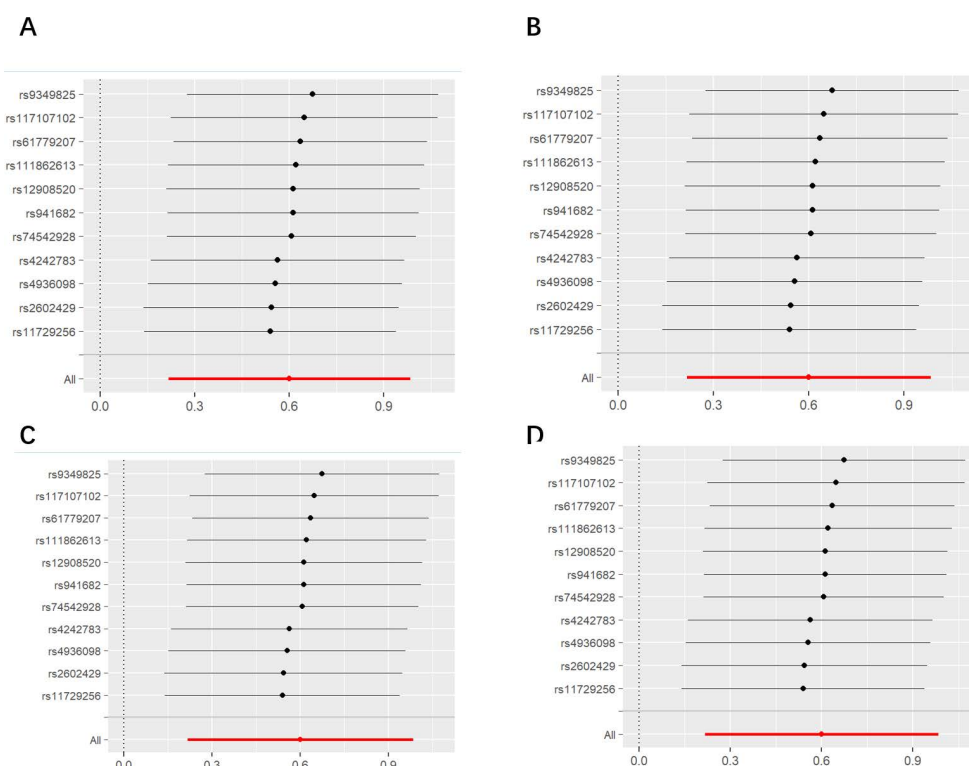

## Supplement Figure S10

MR analysis between T1DN and Genus. Eubacterium.

A: Scatter plots of MR analysis

B: Funnel plots of MR analysis

C: Leave-one-out plots of MR analysis

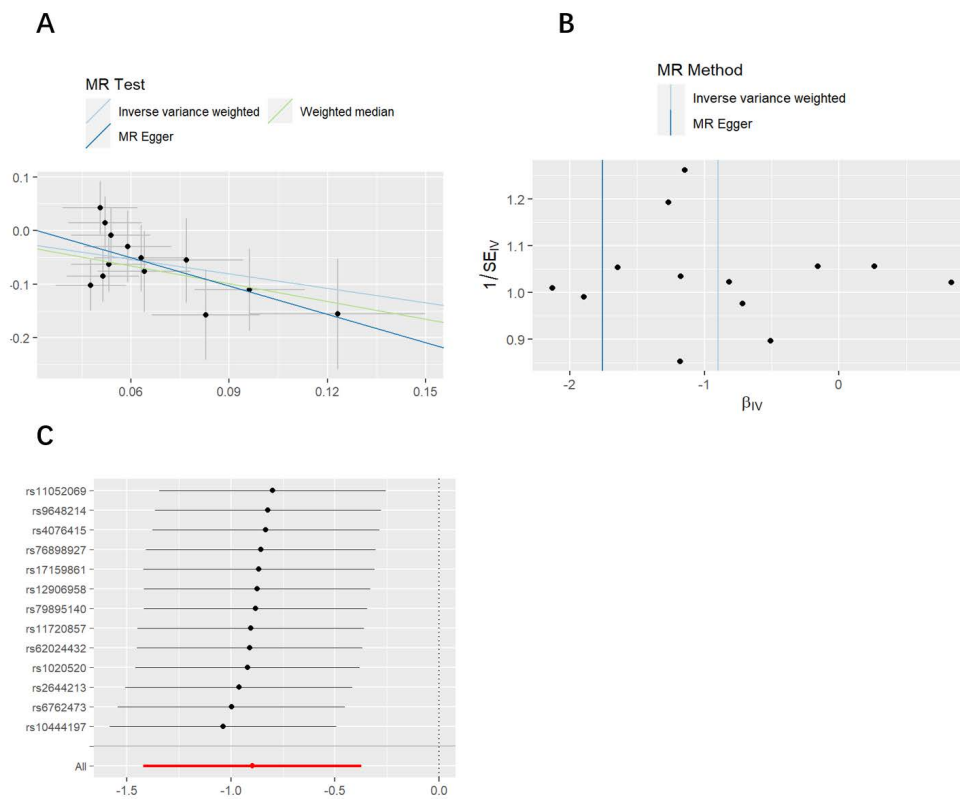

Supplement: DataSheet_1.pdf [file DataSheet_1.pdf]
